# Supplementary material
Source: PubMed Central journal article supplement (PMC4432657)
Supplement: ncomms7982-s1.pdf [file ncomms7982-s1.pdf]

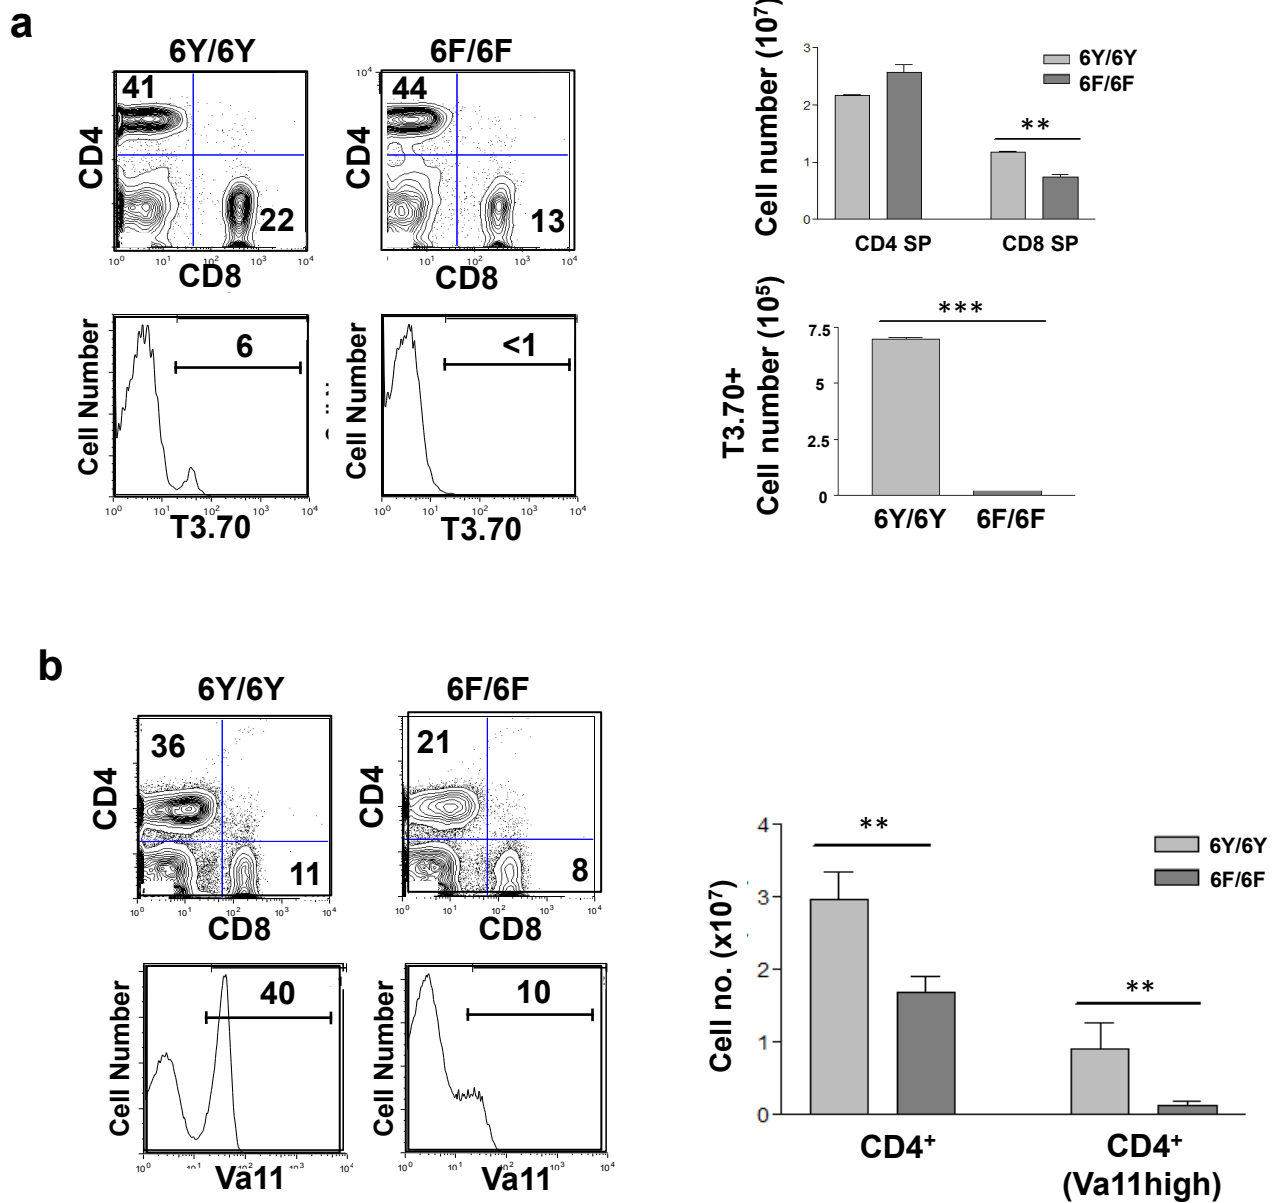

**Supplementary Figure 1.** T cell development in TCR transgenic 6F/6F mice. (a) Upper panels, CD4 vs CD8 profile of lymph node cells from H-Y;6Y/6Y and H-Y; 6F/6F female mice. Lower panels, staining of total lymph node cells with antibody to H-Y TCR (T3.70). Right upper panel, number of CD4-SP and CD8-SP splenocytes in H-Y;6Y/6Y and H-Y; 6F/6F female mice. Right lower panel, number of T3.70<sup>+</sup> CD8-SP splenocytes in H-Y;6Y/6Y and H-Y; 6F/6F female mice. Data are from 10 mice of each genotype. (b) Upper panels, CD4 vs CD8 profile of lymph node cells from AND;6Y/6Y and AND; 6F/6F female mice. Lower panels, staining of total lymph node cells with antibody to AND TCR V $\alpha$  chain (Va11). Right, number of total CD4-SP splenocytes and Va11<sup>+</sup> CD4-SP splenocytes in AND;6Y/6Y and AND; 6F/6F female mice. Data are from 10 mice of each genotype. For bar graphs, data were analyzed by Unpaired t-test (Two-tailed) and are represented as mean  $\pm$  SD \* $p$ <.05; \*\* $p$ <.01; \*\*\* $p$ <.005.

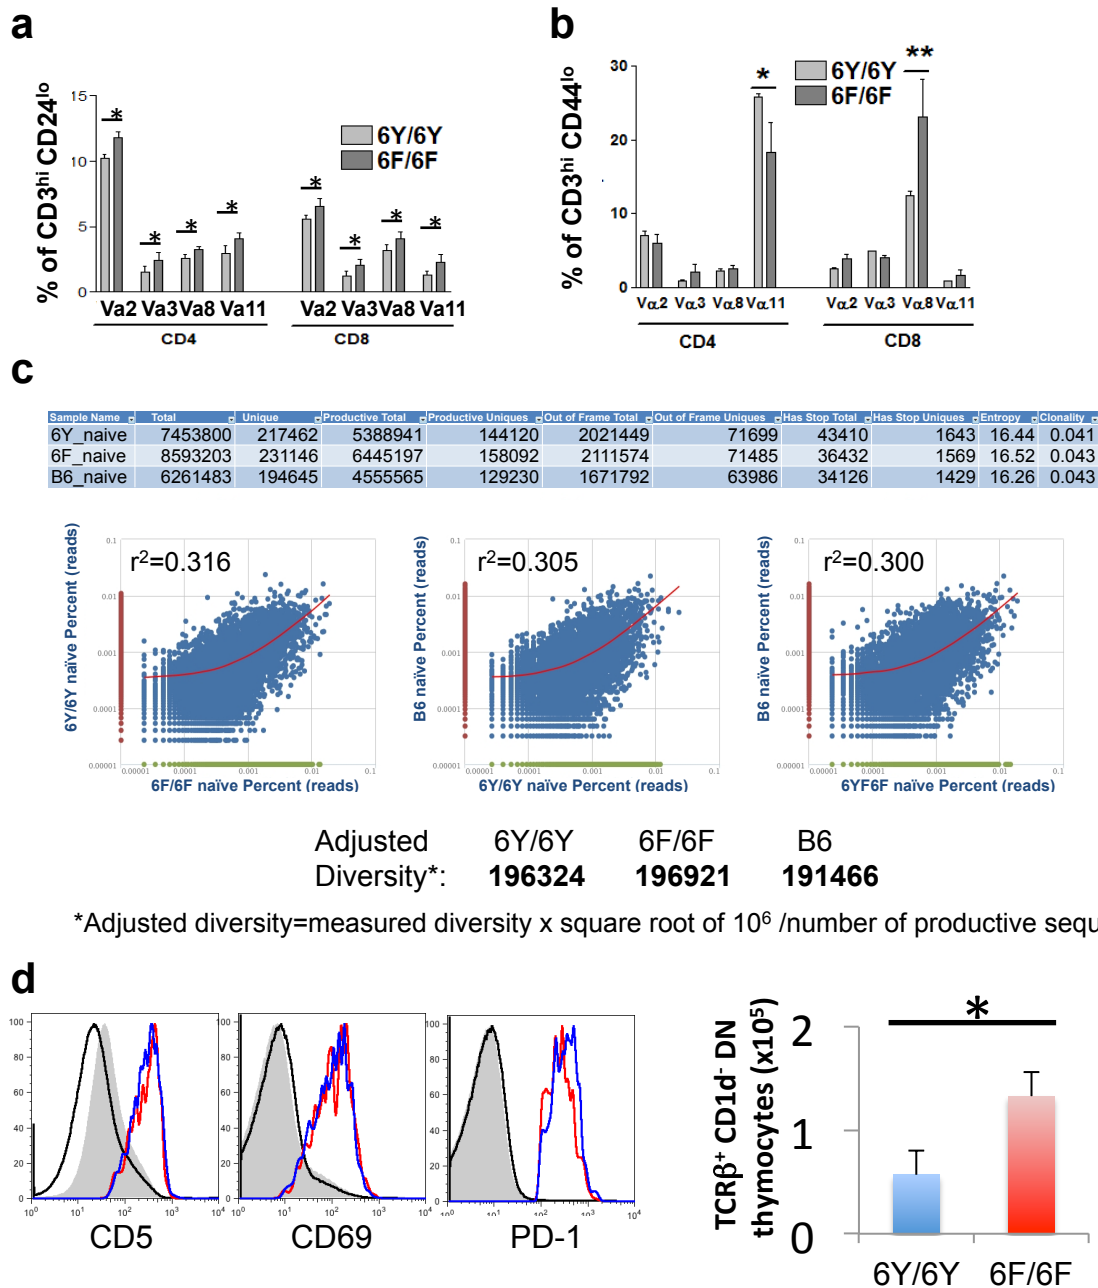

**Supplementary Figure 2.** TCRV $\alpha$  usage and TCRV $\beta$  sequencing of TCRs in 6F/6F mice. (a) TCR V $\alpha$  usage in 6Y/6Y and 6F/6F mice. Thymocytes were stained with anti-CD3/4/8/24 and the indicated V $\alpha$  antibodies. Shown are percentage of CD3<sup>hi</sup> CD24<sup>lo</sup> CD4-SP or CD8-SP thymocytes that express the indicated V $\alpha$  chain. N = 5 mice of each genotype. (b) V $\alpha$  usage in V $\beta$ 3 TCR transgenic 6Y/6Y and 6F/6F mice. Thymocytes (upper panel) or splenocytes (lower panel) were stained with anti-CD3/4/8/24 (thymocytes) or anti-CD3/4/8/44 (splenocytes) and the indicated V $\alpha$  antibodies. Shown are percentage of CD3<sup>hi</sup> CD24<sup>lo</sup> CD4-SP or CD8-SP thymocytes or CD3<sup>hi</sup> CD44<sup>lo</sup> CD4-SP or CD8-SP splenocytes that express the indicated V $\alpha$  chain. N = 6 mice of each genotype. (c) Upper panel, summary of results of deep sequencing of TCR $\beta$  chain V regions from naïve CD4-SP T cells from 6Y/6Y and 6F/6F mice. Lower panels, comparison plots of CDR3 DNA sequences data from B6, 6Y/6Y and 6F/6F CD4-T cells. Linear regression plots are shown in red.  $r^2$  values are shown in each plot. (d) Enumeration of 'clonally diverted' DN thymocytes. Left panels, staining of DN  $\alpha\beta$ TCR<sup>+</sup> PBS-57:CD1d-tetramer-negative 6Y/6Y (blue) or 6F/6F (red) thymocytes with CD5, CD69, PD-1. Staining of CD4<sup>+</sup>CD8<sup>+</sup> thymocytes from 6Y/6Y (gray) or 6F/6F (black) mice are shown for comparison. Right panel, number of DN  $\alpha\beta$ TCR<sup>+</sup> PBS-57:CD1d-tetramer-negative thymocytes in 6Y/6Y and 6F/6F mice. N = 3 mice of each genotype. For bar graphs, data are represented as mean  $\pm$  SD \* $p$ <.05; \*\* $p$ <.01; \*\*\* $p$ <.005.

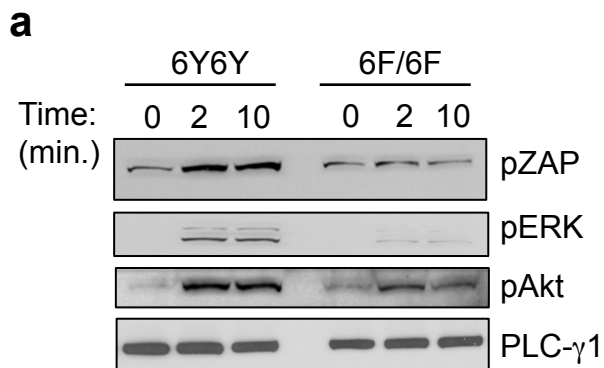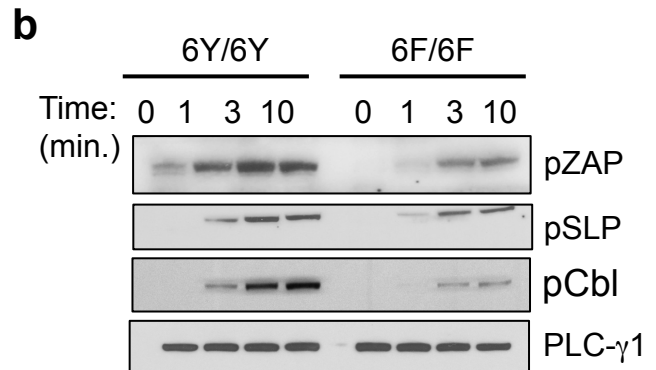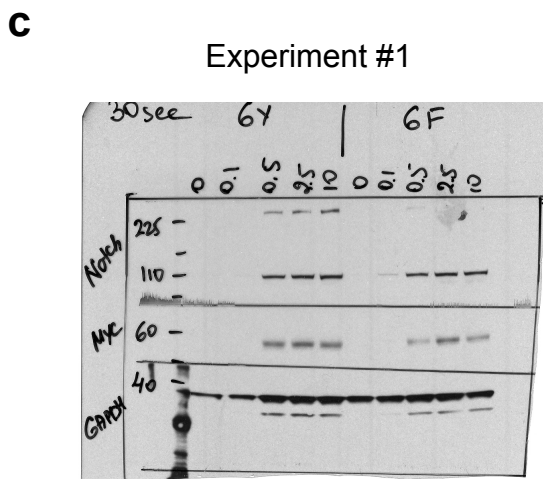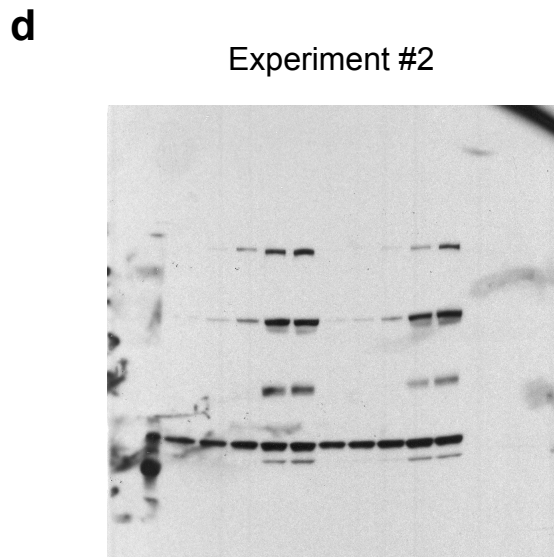

**Supplementary Figure 3. TCR-mediated signaling in 6Y/6Y and 6F/6F T cells.** (a,b) Naïve (CD44<sup>+</sup> CD25<sup>-</sup>) lymph node CD4-SP T cells from 6Y/6Y and 6F/6F were stimulated for the indicated times with plate-bound anti-TCR $\beta$  + anti-CD28 and whole cell extracts were analyzed by SDS-PAGE and western blotting with the indicated antibodies. Results are representative of 3 independent experiments. (c) Original blots for data shown in Figure 3b.

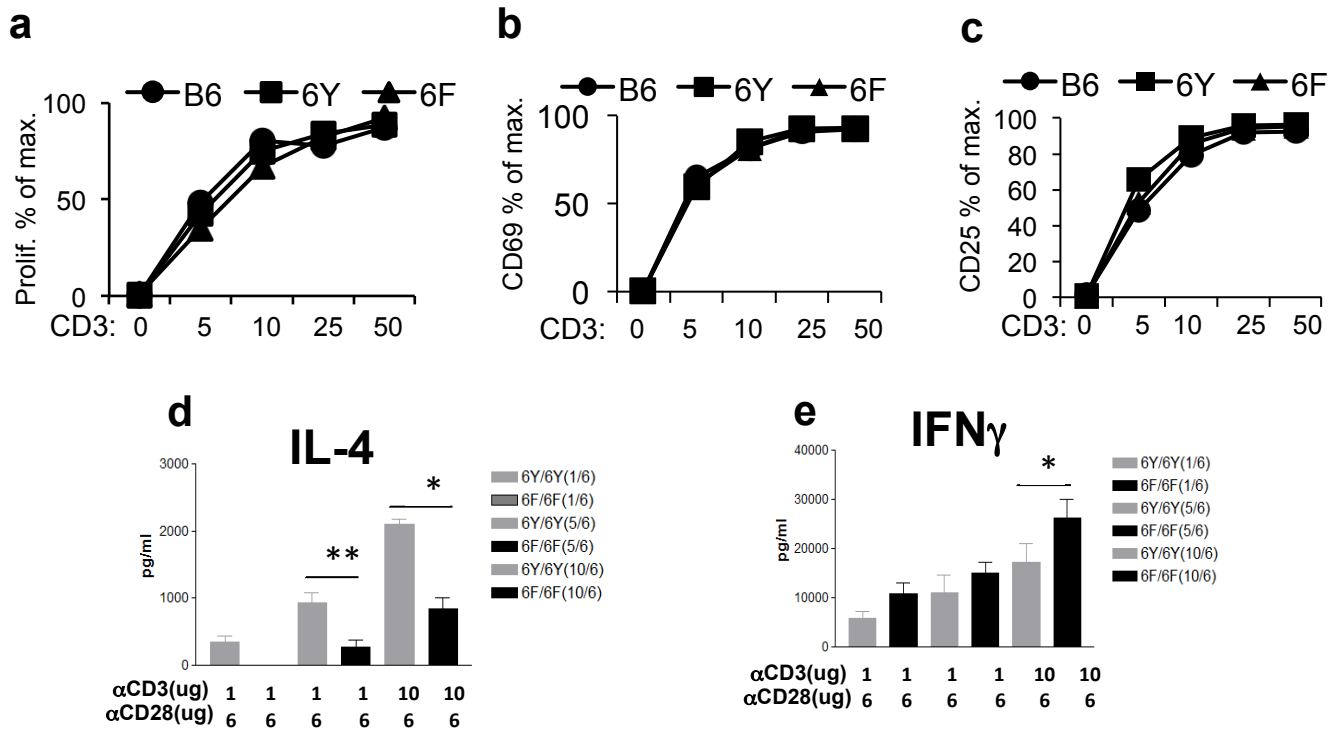

**Supplementary Figure 4.** Analysis of mature T cell function in 6Y/6Y and 6F/6F mice. (a) Proliferation of CD8-SP T cells. Naïve (CD44<sup>lo</sup>) CD8-SP lymph node T cells were stimulated for 3 days with the indicated amount of plate-bound anti-CD3 antibody. (b,c) Activation-induced up-regulation of CD69 (b) and CD25 (c). Naïve (CD44<sup>lo</sup>CD25<sup>-</sup>) CD4-SP lymph node T cells were stimulated for 3 days with the indicated amount of plate-bound anti-CD3 antibody. Results are shown as percent of maximum proliferation with PMA + ionomycin as assessed by CFSE dilution. One representative of 3 independent experiments. (d,e) IL-4 and IFN $\gamma$  production by 6Y/6Y and 6F/6F T cells. Naïve CD4-SP T cells were incubated on antibody coated plates for 4 days under Th2 conditions or under Th1 conditions. Cells were rested overnight then stimulated for 4 hrs with PMA + ionomycin in the presence of golgi block, surface stained for CD4 and stained intracellularly for IL-4 or IFN $\gamma$ . One representative of 2 experiments. Statistical data were analyzed by Unpaired t-test (Two-tailed) and are represented as mean  $\pm$  SD. \* $p < .05$ ; \*\* $p < .01$ .

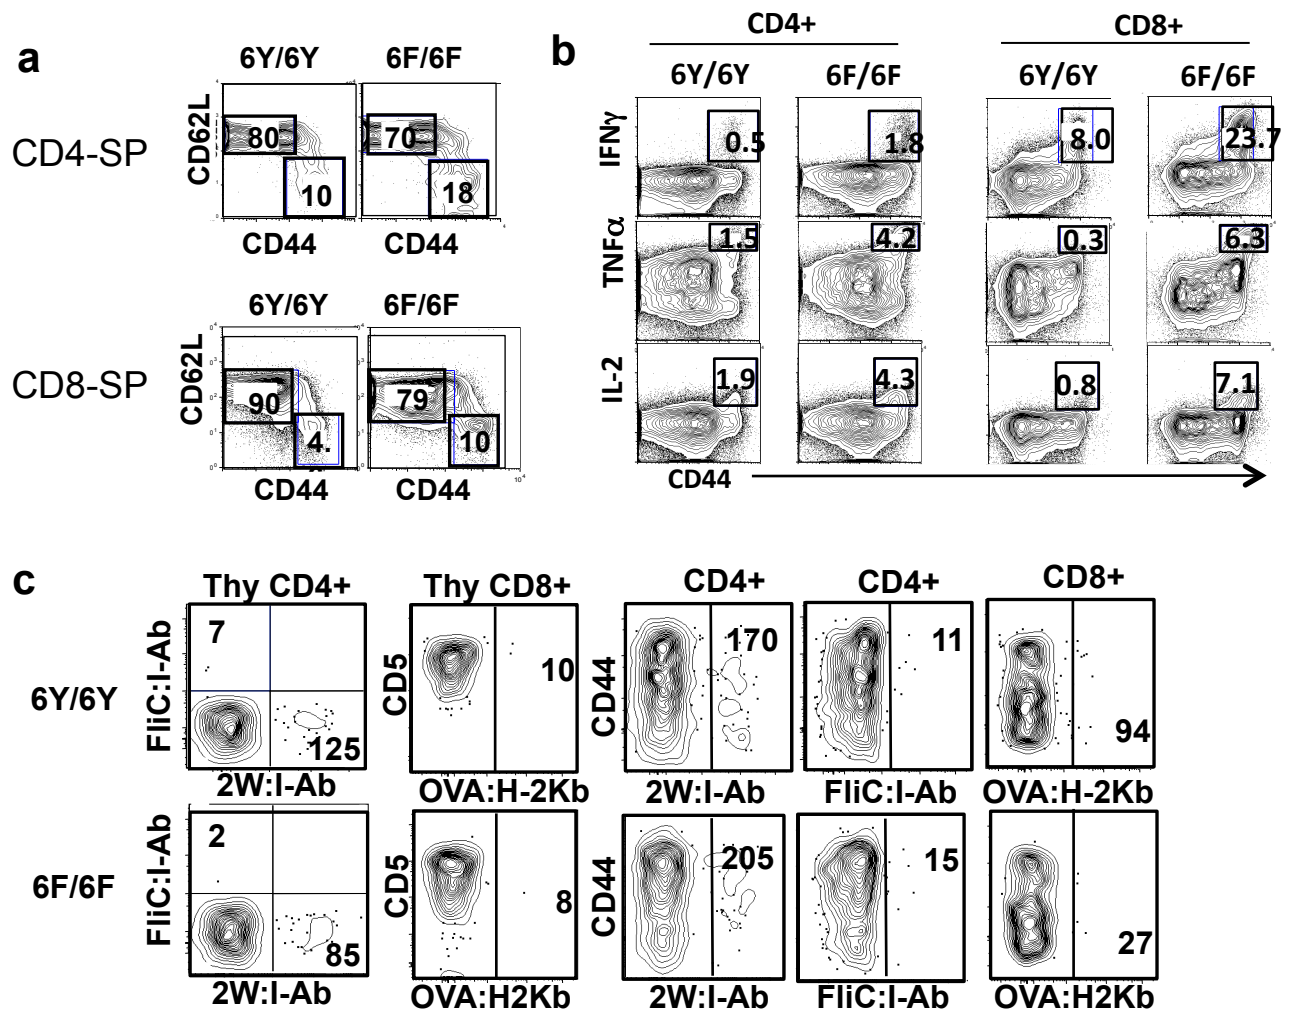

**Supplementary Figure 5.** Phenotype and naïve repertoire analysis of peripheral T cells in 6Y/6Y and 6F/6F mice. (a) CD44 vs CD62L staining profiles of gated CD4-SP (upper panel) or CD8-SP (lower panel) lymph node T cells from 6Y/6Y or 6F/6F mice. Percentage of naïve (CD62L<sup>hi</sup>CD44<sup>lo</sup>) and memory phenotype (CD62L<sup>lo</sup>CD44<sup>hi</sup>) cells are shown. One representative of 8 experiments. (b) Percentage of cytokine positive T cells in 6Y/6Y and 6F/6F mice. Lymph node T cells were isolated from 6Y/6Y and 6F/6F mice, stimulated for 4 hrs with PMA + ionomycin in the presence of golgi block, surface stained for CD4/8/44 and stained intracellularly for IL-2, TNF $\alpha$  or IFN $\gamma$ . Percentage of cytokine positive cells in the indicated gate is shown. Results shown are representative of 3 independent experiments. (c) Enumeration of antigen-specific T cell pools in un-immunized 6Y/6Y and 6F/6F mice. Total numbers of 2W/I-A<sup>b</sup> specific, FliC/I-A<sup>b</sup> specific or OVA/K<sup>b</sup> specific thymocytes (2 left panels) or peripheral (lymph node and spleen) T cells (3 right panels) were analyzed by tetramer enrichment.

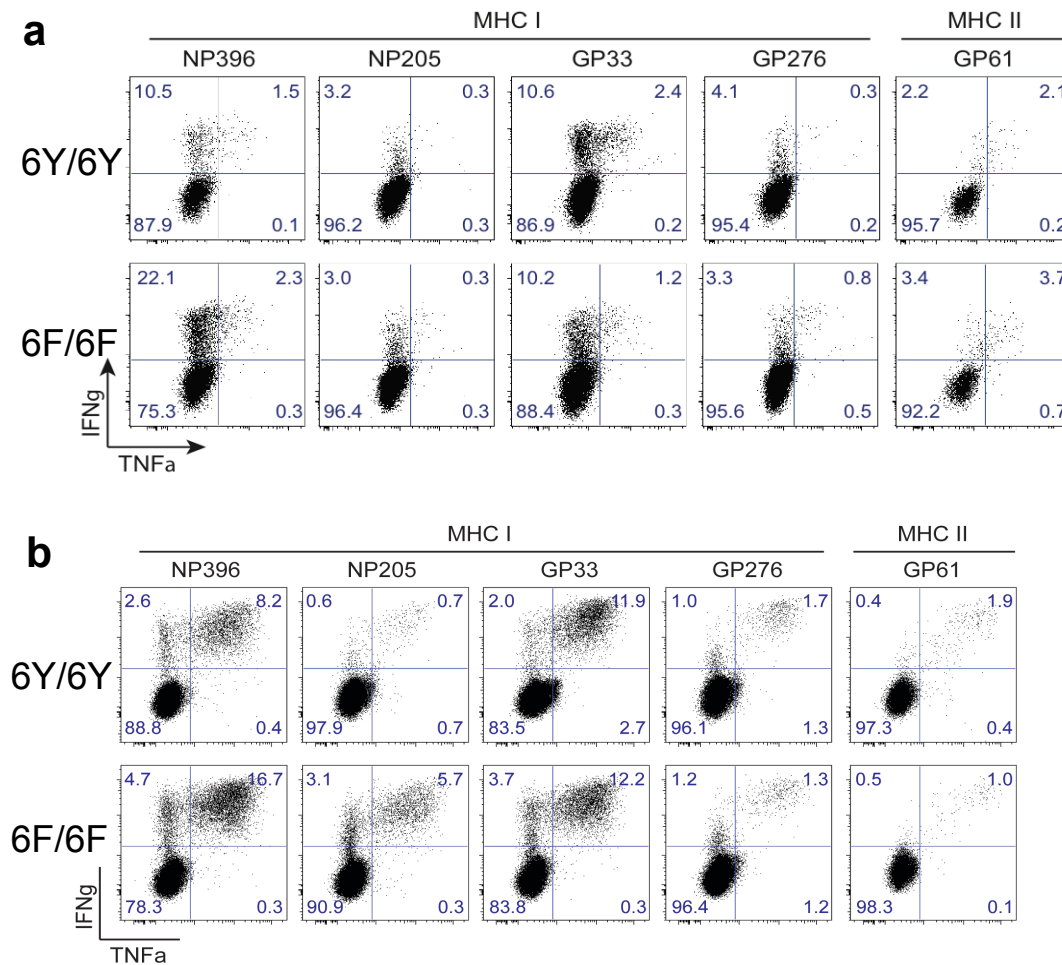

**Supplementary Figure 6.** T cell responses to LCMV infection.

Mice were infected with LCMV Armstrong and spleen T cells were analyzed 8 days (a) or 45 days (b) after infection. Plots show percentage of IFN $\gamma$ <sup>+</sup> and/or TNF $\alpha$ <sup>+</sup> splenocytes detected after 5hr *in vitro* stimulation with the indicated peptides.

**a**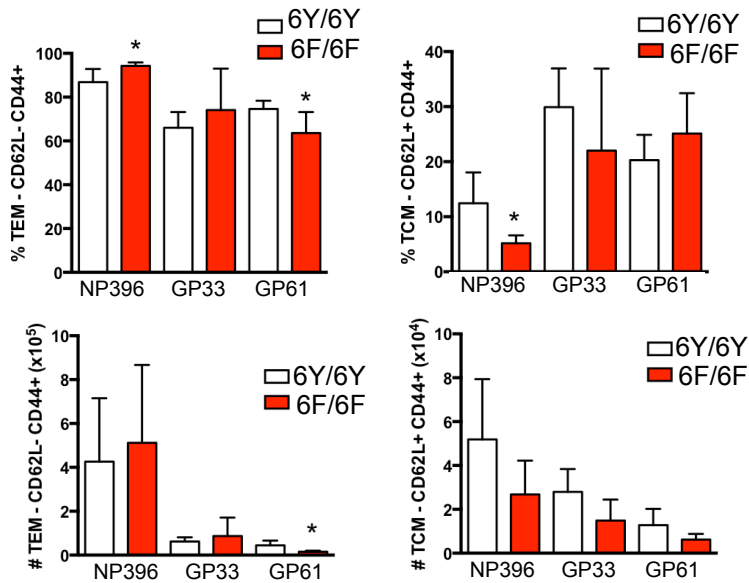**b**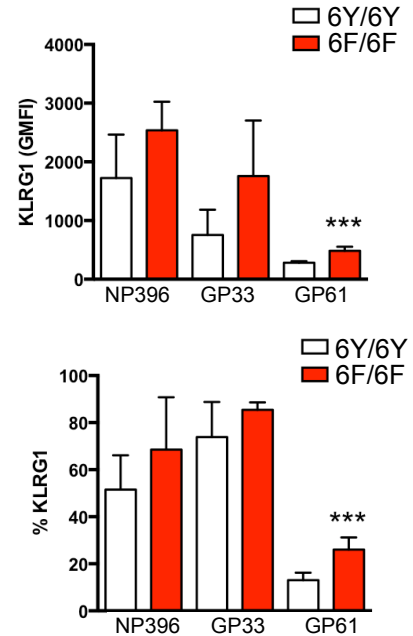**Supplementary Figure 7.** Memory T cell responses to LCMV infection.

(a) Right, percentage (upper panel) or number (lower panel) of T effector memory phenotype tetramer-positive splenocytes 45 days after LCMV infection. Left, percentage (upper panel) or number (lower panel) of T central memory phenotype tetramer-positive splenocytes 45 days after LCMV infection. 6 mice were analyzed for each group. (b) MFI of KLRG1 surface staining (upper panel) or % KLRG1 positive cells (lower panel) bound by the indicated tetramer 45 days after LCMV infection. For bar graphs, data were analyzed by Unpaired t-test (Two-tailed) and are represented as mean  $\pm$  SEM \* $p < .05$ ; \*\* $p < .01$ ; \*\*\* $p < .005$ .

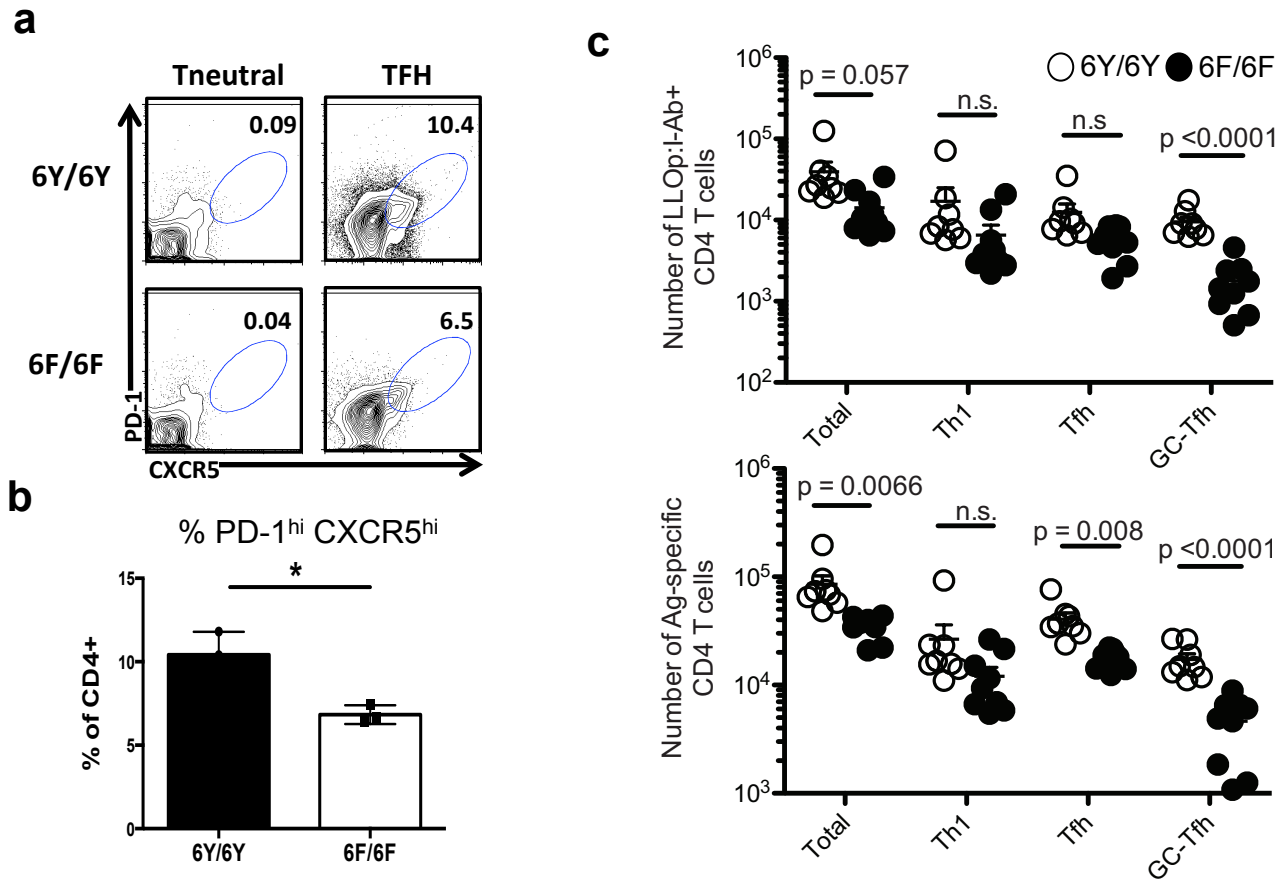

**Supplementary Figure 8.** TFH cell induction in 6Y/6Y and 6F/6F mice infected with *Listeria monocytogenes*. (a) *In vitro* induction of TFH from purified naïve (CD44<sup>-</sup> CD25<sup>-</sup>) CD4-SP T cells from 6Y/6Y and 6F/6F mice. Shown are percentages of CXCR5<sup>+</sup> PD-1<sup>+</sup> TFH phenotype cells. (b) Summary of *in vitro* TFH induction experiments. N=3 mice of each genotype. (c) Age and gender-matched 6Y/6Y and 6F/6F mice (14 of each) were infected with *Listeria monocytogenes* that expresses 2W peptide and splenocytes were analyzed by FACS 10 days after infection. The number of Listeriolysin O (LLO)-A<sup>b</sup> specific splenocytes was determined by tetramer staining. Th1 (CD4<sup>+</sup>IFN $\gamma$ <sup>+</sup>), TFH (CD4<sup>+</sup>CXCR5<sup>+</sup>PD-1<sup>+</sup>), GC-TFH (CD4<sup>+</sup>CXCR5<sup>hi</sup> PD-1<sup>hi</sup>). For bar graphs, data are represented as mean  $\pm$  SD \*p<.05; \*\*p<.01; \*\*\*p<.005.
